# Supplementary material for: Size, Shape, and Sequence-Dependent Immunogenicity of RNA Nanoparticles
Source: PubMed Central journal article supplement — Mol Ther Nucleic Acids. 2017 Oct 17;9:399–408. doi: 10.1016/j.omtn.2017.10.010 (PMC5701797; doi:10.1016/j.omtn.2017.10.010), 2017-10-17
Supplement: mmc1.pdf [file mmc1.pdf]

**OMTN, Volume 9**

**Supplemental Information**

**Size, Shape, and Sequence-Dependent  
Immunogenicity of RNA Nanoparticles**

**Sijin Guo, Hui Li, Mengshi Ma, Jian Fu, Yizhou Dong, and Peixuan Guo**

## SUPPLEMENTAL INFORMATION:

### Supplemental Figures:

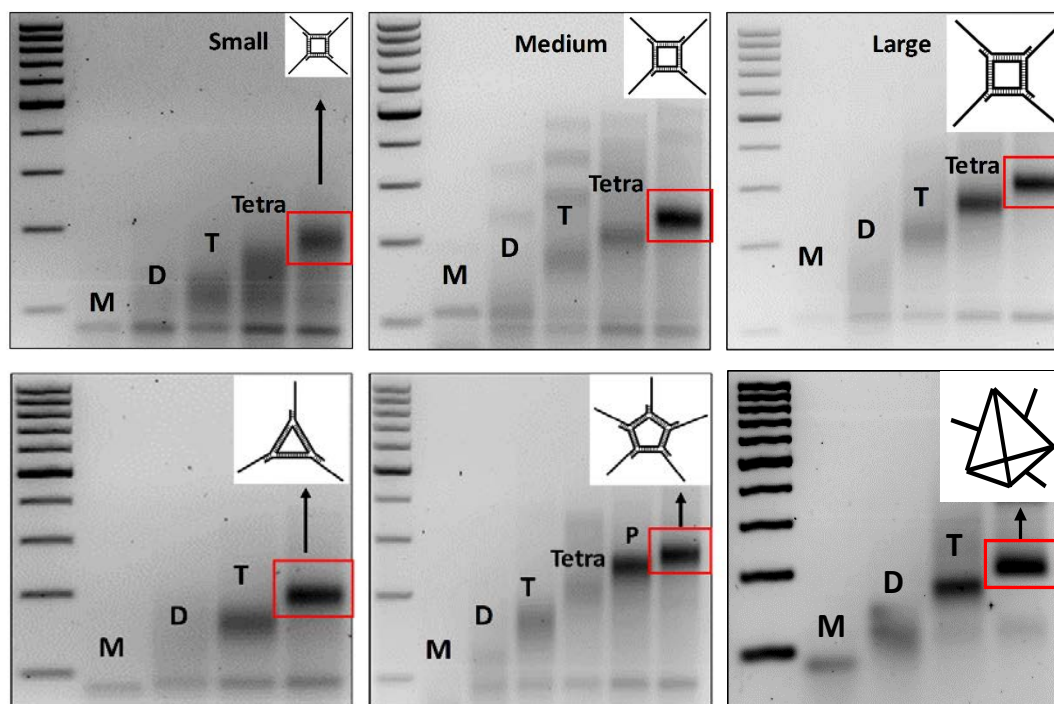

**Figure. S1.** Step-wise self-assembly of small, medium and large 2'F SQR-SEQ, 2'F TRI-SEQ, 2'F PENTA-SEQ and 2'F Tetrahedron-SEQ evaluated by 3% agarose gel (M=monomer, D=dimer, T=trimer, Tetra=tetramer, P=pentamer; ladder: 100 bp DNA).

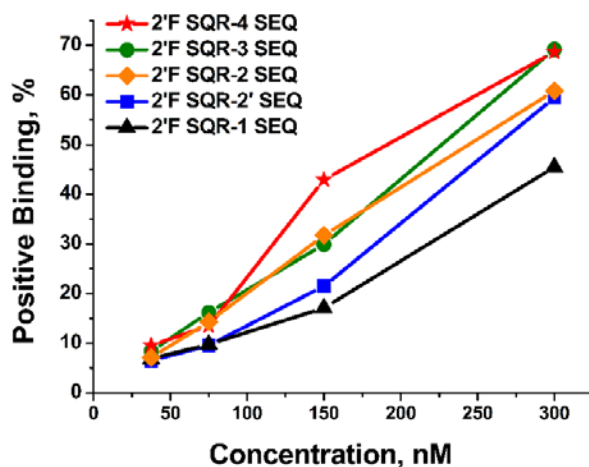

**Figure. S2.** Flow cytometry analysis showing the increased cellular binding of medium 2'F SQR-SEQ to RAW 264.7 cells as more copies of 2'F SEQ incorporated (2'F SQR-2 SEQ refers to 2'F Square with two SEQ extensions on the neighboring vertexes, and 2'F SQR-2' SEQ means 2'F Square with two SEQ extensions on the opposite vertexes).

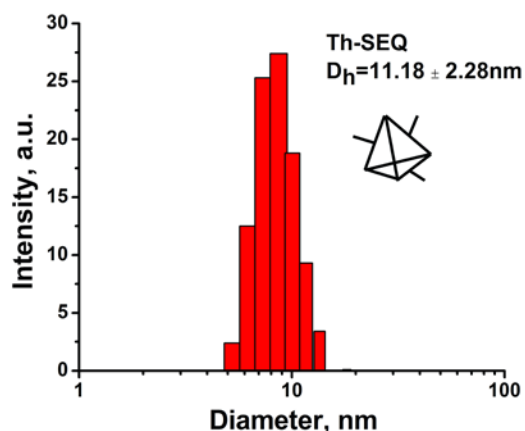

**Figure. S3.** Size distribution histogram of 2'F Tetrahedron (Th)-SEQ measured by DLS (n=3).

### Comparison of 2'F SQR-SEQ and 2'F SQR-double-stranded SEQ

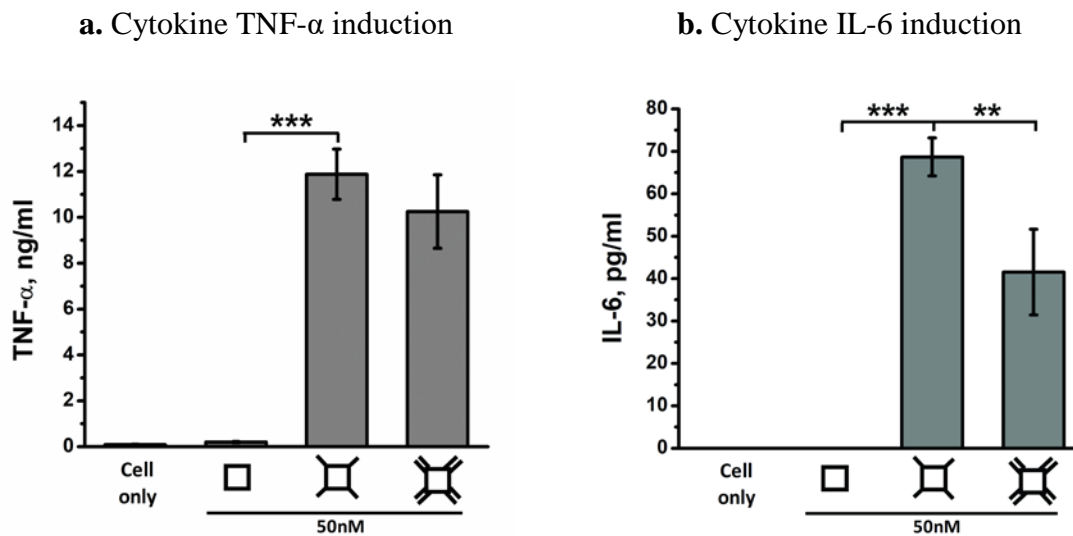

**Figure. S4.** Cytokines **a.** TNF- $\alpha$  and **b.** IL-6 induction by medium 2'F SQR-SEQ, 2'F SQR-double-stranded SEQ and control groups (concentrations refer to nanoparticles; results were presented as mean $\pm$ standard deviation, n=3, \*\* $P < 0.01$ , \*\*\* $P < 0.001$ , analyzed by student's t test).

**Table S1.** Sequences for primary RNA nanoparticles (5'→3')

|                                                                   |                                                                                              |
|-------------------------------------------------------------------|----------------------------------------------------------------------------------------------|
| SEQ (20nt)                                                        | UCCAUGACGUUCCUGACGUU                                                                         |
| Mutated SEQ I (20nt)                                              | UCCAUGAGCUUCCUGACGUU                                                                         |
| Mutated SEQ II (20nt)                                             | UCCAUGAGCUUCCUGAGCUU                                                                         |
| Scramble sequence(20nt)                                           | GCAGCUUUGGCUGAGCGUAU                                                                         |
| Complementary SEQ (20nt)                                          | AACGUCAGGA ACGUCAUGGA                                                                        |
| Small SQR A-SEQ (63nt)                                            | GGUCCAUGACGUUCCUGACGUUUUUUUGGGCCGUCAAUCAUGACCGU<br>ACUUUGUUGCACGCC                           |
| Small SQR B-SEQ (63nt)                                            | GGUCCAUGACGUUCCUGACGUUUUUUUGGGCGACCCAAUCAUGUCUCU<br>ACUUUGUUGGCUGGCC                         |
| Small SQR C-SEQ (63nt)                                            | GGUCCAUGACGUUCCUGACGUUUUUUUGGCCAGCCAAUCAUGCACAU<br>ACUUUGUUGACGGCCC                          |
| Small SQR D-SEQ (63nt)                                            | GGUCCAUGACGUUCCUGACGUUUUUUUGGGCGUGCAAUCAUGUAGUU<br>ACUUUGUUGGGUCGCC                          |
| Small SQR E (48nt)                                                | GGUCAUGUGUAUGUGCAUGUGUAGAGACAUGUGUAACUACAUGUGU<br>AC                                         |
| Medium SQR A-SEQ (73nt)<br>TRI A-SEQ (73nt)<br>PENTA A-SEQ (73nt) | GGUCCAUGACGUUCCUGACGUUUUUUUGGGCCGUCAAUCAUGGCAAG<br>UGUCCGCCAUACUUUGUUGCACGCC                 |
| Medium SQR B-SEQ (73nt)<br>PENTA B-SEQ (73nt)                     | GGUCCAUGACGUUCCUGACGUUUUUUUGGGCGACCCAAUCAUGGCAAC<br>GAUAGAGCAUACUUUGUUGGCUGGCC               |
| Medium SQR C-SEQ (73nt)<br>TRI C-SEQ (73nt)<br>PENTA C-SEQ (73nt) | GGUCCAUGACGUUCCUGACGUUUUUUUGGCCAGCCAAUCAUGGCAAU<br>AUACACGCAUACUUUGUUGACGGCCC                |
| Medium SQR D-SEQ (73nt)                                           | GGUCCAUGACGUUCCUGACGUUUUUUUGGGCGUGCAAUCAUGACAAG<br>CGCAUCGCAUACUUUGUUGGGUCGCC                |
| Medium SQR E (88nt)                                               | GGACACUUGUCAUGUGUAUGCGUGUAUAUUGUCAUGUGUAUGCUCUA<br>UCGUUGUCAUGUGUAUGCGAUGCGCUUGUCAUGUGUAUGGC |
| TRI B-SEQ (73nt)                                                  | GGUCCAUGACGUUCCUGACGUUUUUUUGGGCGUGCAAUCAUGGCAAC<br>GAUAGAGCAUACUUUGUUGGCUGGCC                |
| TRI D (66nt)                                                      | GGACACUUGUCAUGUGUAUGCGUGUAUAUUGUCAUGUGUAUGCUCUA<br>UCGUUGUCAUGUGUAUGGC                       |
| PENTA D-SEQ (73nt)                                                | GGUCCAUGACGUUCCUGACGUUUUUUUGGCCCUCAAUCAUGGCAAG<br>CGCAUCGCAUACUUUGUUGGGUCGCC                 |

|                                    |                                                                                                                                                                                      |
|------------------------------------|--------------------------------------------------------------------------------------------------------------------------------------------------------------------------------------|
| PENTA E-SEQ (73nt)                 | GGUCCAUGACGUUCCUGACGUUUUUUUGGGCGUGCAAUCAUGGCAAA<br>UAUGCGCCAUACUUUGUUGUAGGGCC                                                                                                        |
| PENTA F (110nt)                    | GGACACUUGUCAUGUGUAUGCGUGUAUAUUGUCAUGUGUAUGCUCUA<br>UCGUUGUCAUGUGUAUGCGAUGCGCUUGUCAUGUGUAUGGGCGCAUAU<br>UUGUCAUGUGUAUGGC                                                              |
| Large SQR A-SEQ (93nt)             | GGUCCAUGACGUUCCUGACGUUUUUUUGGGCCGUCAAUCAUGGCAAG<br>UGUCCGCAAGCAUAGCUCGGAUAGCCUCAUACUUUGUUGCACGCCC                                                                                    |
| Large SQR B-SEQ (93nt)             | GGUCCAUGACGUUCCUGACGUUUUUUUGGGCGACCCAAUCAUGGCAAC<br>GAUAGAGGCAUAGUCGACCUAUGCAUCCAUAUACUUUGUUGGCUGGCC                                                                                 |
| Large SQR C-SEQ (93nt)             | GGUCCAUGACGUUCCUGACGUUUUUUUGGGCCAGCCAAUCAUGGCAAU<br>AUACACGCGAGUUGCCACGAGGACGCUCAUACUUUGUUGACGGCCC                                                                                   |
| Large SQR D-SEQ (93nt)             | GGUCCAUGACGUUCCUGACGUUUUUUUGGGCGUGCAAUCAUGACAAG<br>CAUCGCAUUCGGUGUCGUAGUCCUUCGCAUACUUUGUUGGGUCGCC                                                                                    |
| Large SQR E (168nt)                | GGACACUUGUCAUGUGUAUGAGCGUCCUCGUGGCAACUCGCGUGUAU<br>AUUGUCAUGUGUAUGGAUGCAUAGGUCGACUAUGCCUCUAUCGUUGU<br>CAUGUGUAUGCGAAGGACUACGACACGGAAUGCGAUGCUUGUCAUGU<br>GUAUGAGGCUAUCCGAGCUAUGCUUGC |
| Th A-SEQ (115nt)                   | GGUCCAUGACGUUCCUGACGUUUUUUUGGACUGAUACGAAUCAUCGU<br>GUAGCACCAGCUGUAAUCGAUGUGUACGGGAAGAGCCUAUGCCCAUC<br>CUACUUUGUUCUACUAUGGCG                                                          |
| Th B-SEQ (115nt)                   | GGUCCAUGACGUUCCUGACGUUUUUUUGGUGCUACACGAUGUGUAGC<br>CAGACUUAGCGGAAUGUUCGUACUUUGUUCAUGCGAGGCCGUCCAAU<br>ACCGAAUCAUCGAUUACAGCU                                                          |
| Th C-SEQ (115nt)                   | GGUCCAUGACGUUCCUGACGUUUUUUUGGGCAGUUGAGAUGUGUACG<br>AACAUUCCGCUAAGUCUGGCUACUUUGUUCGUAUCAGUCCCGCCAUA<br>GUAGAAUCAUCGUAUCACCAU                                                          |
| Th D (88nt)                        | GGCCUCGCAUGAAUCAUCUCAACUGCCCAUGGUGAUACGAUGUGUAG<br>GAUGGGCAUAGGCUCUCCCGUACUUUGUUCGGUAUUGGAC                                                                                          |
| RNA SQR<br>(small, medium & large) | Reference (54)                                                                                                                                                                       |
| RNA TRI, SQR & PENTA               | Reference (59)                                                                                                                                                                       |
| RNA Th                             | Reference (43)                                                                                                                                                                       |

(SEQ: specific sequence, TRI: triangle, SQR: square, PENTA: pentagon, Th: tetrahedron)

## **Supplemental Methods:**

### **Flow Cytometry Assay**

$5 \times 10^5$  RAW 264.7 cells were suspended in Opti-MEM medium in 1.5mL eppendorf tubes. Cy3-labeled RNA nanoparticles were diluted in Opti-MEM medium at 100nM and incubated with cells at 37 °C for 1.5 hours. After washing with PBS buffer (137 mM NaCl, 2.7 mM KCl, 100 mM Na<sub>2</sub>HPO<sub>4</sub>, 2 mM KH<sub>2</sub>PO<sub>4</sub>, pH 7.4) to remove unbound nanoparticles, cells were re-suspended in PBS buffer and the cell binding efficacy was determined by FACSCalibur flow cytometer (BD Biosciences, San Jose, CA).
